# Supplementary material for: Arginine Thiazolidine Carboxylate Stimulates Insulin Secretion through Production of Ca2+-Mobilizing Second Messengers NAADP and cADPR in Pancreatic Islets
Source: PLOS journal article supplement (doi:10.1371/journal.pone.0134962), 2015-08-06
Supplement: S3 (10.1371/journal.pone.0134962.s003) [file journal.pone.0134962.s003]

**A**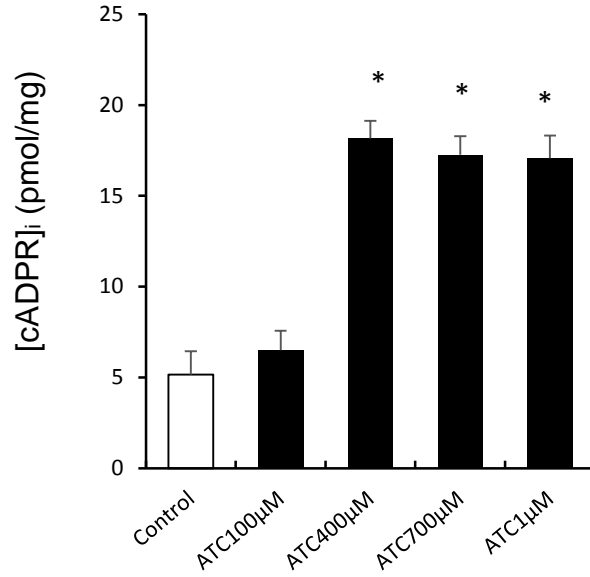**B**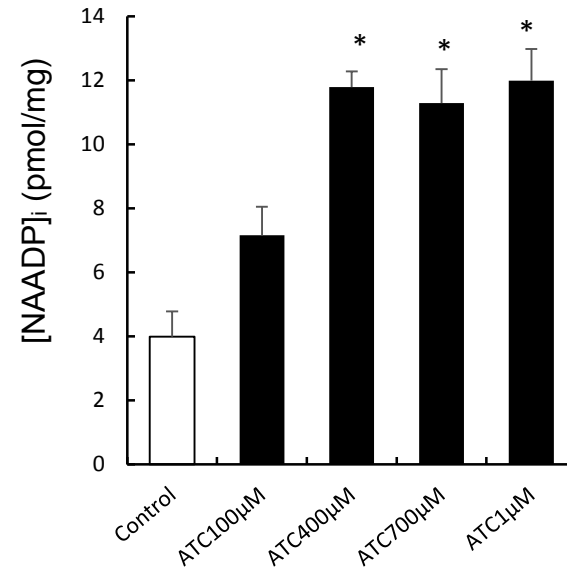

**S3 Fig. ATC-induced cADPR and NAADP production in pancreatic  $\beta$  cell.** Islets were treated with/without ATC(100, 400, 700  $\mu$ M, and 1  $\mu$ M) and measured cADPR (A) and NAADP (B) levels. \*,  $P < 0.05$  versus CON cADPR and NAADP level. All data are expressed as the Mean  $\pm$  SEM.
