# Supplementary material for: Arginine Thiazolidine Carboxylate Stimulates Insulin Secretion through Production of Ca2+-Mobilizing Second Messengers NAADP and cADPR in Pancreatic Islets
Source: PLOS journal article supplement (doi:10.1371/journal.pone.0134962), 2015-08-06
Supplement: S5 (10.1371/journal.pone.0134962.s005) [file journal.pone.0134962.s005]

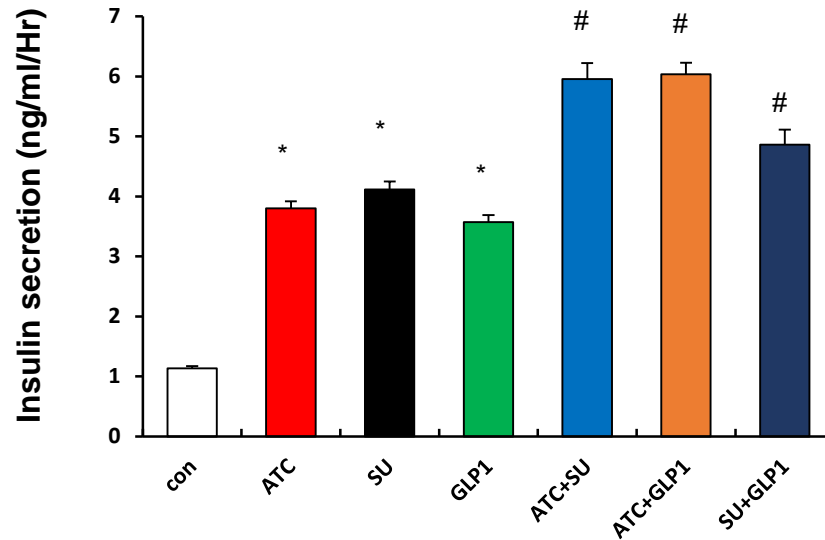

**S5 Fig. Effect of ATC, SU, GLP-1 and combined treatment on insulin secretion in pancreatic islets.** \*,  $P < 0.05$  versus CON insulin secretion level. #,  $P < 0.05$  versus ATC complex treated level. All data are expressed as the Mean  $\pm$  SEM.
